# Supplementary material for: Impact of Subsyndromal Delirium Occurrence and Its Trajectory during ICU Stay
Source: MDPI journal article supplement (doi:10.3390/jcm11226797), 2022-11-17
Supplement: s1 [file s1]

# Supplementary material S1

| Characteristics                   | Univariate logistic models |         | Multivariate logistic model |              |         |
|-----------------------------------|----------------------------|---------|-----------------------------|--------------|---------|
|                                   | OR                         | p-value | OR <sub>aj</sub> *          | CI (95%)     | p-value |
| <b>Mental status</b>              |                            | < 0.001 |                             |              | 0.79    |
| Normal                            | 1                          |         | 1                           |              |         |
| SSD who sustained or improved     | 1.02                       | 0.937   | 1.32                        | 0.83 – 9.27  | 0.426   |
| SSD who progress to delirium/coma | 2.19                       | 0.034   | 1.38                        | 0.56 – 20.73 | 0.508   |
| Delirium /Coma                    | 4.61                       | < 0.001 | 1.48                        | 0.96 – 10.86 | 0.988   |
| <b>Mechanical Ventilation</b>     |                            |         |                             |              |         |
| non-ventilated                    | 1                          |         | 1                           |              |         |
| mechanically ventilated           | 14.92                      | < 0.001 | 7.42                        | 4.64 - 12.38 | < 0.001 |
| <b>Diagnostic of admission</b>    |                            |         |                             |              |         |
| Surgical                          | 1                          |         | 1                           |              |         |
| Medical                           | 6.61                       | < 0.001 | 3.73                        | 2.48 - 5.71  | < 0.001 |
| <b>Gender</b>                     |                            |         |                             |              |         |
| Female                            | 1                          |         | 1                           |              |         |
| Male                              | 1.09                       | 0.582   | 0.98                        | 0.96 – 3.86  | 0.908   |
| <b>Benzodiazepin use</b>          |                            |         |                             |              |         |
| No                                | 1                          |         | 1                           |              |         |
| Yes                               | 2.73                       | < 0.001 | 1.08                        | 0.96 – 3.86  | 0.732   |
| <b>Age</b>                        |                            |         |                             |              |         |
| <50 yo                            | 1                          |         | 1                           |              |         |
| 50 - 69 yo                        | 1.71                       | 0.008   | 1.49                        | 0.86 - 2.56  | 0.151   |
| >70 yo                            | 1.56                       | 0.04    | 1.78                        | 1.00 - 3.25  | 0.057   |
| <b>Apache II</b>                  |                            |         |                             |              |         |
| <24 points                        | 1                          |         | 1                           |              |         |
| >24 points                        | 2.75                       | < 0.001 | 1.17                        | 1.07 - 9.25  | 0.465   |

\*OR<sub>aj</sub> = Odds Ratio adjusted

## Supplementary material S2

| CAM-ICU feature               | Total |       | Cognitive trajectory |      |          |      | P-value<br>(teste $\chi^2$ ) |
|-------------------------------|-------|-------|----------------------|------|----------|------|------------------------------|
|                               |       |       | Improved or stable   |      | Worsened |      |                              |
|                               | n     | %     | n                    | %    | n        | %    |                              |
| <b>Flutuation</b>             |       |       |                      |      |          |      |                              |
| No                            | 69    | 100,0 | 47                   | 68,1 | 22       | 31,9 | 0,729                        |
| Yes                           | 34    | 100,0 | 22                   | 64,7 | 12       | 35,3 |                              |
| <b>Attention deficit</b>      |       |       |                      |      |          |      |                              |
| No                            | 68    | 100,0 | 45                   | 66,2 | 23       | 33,8 | 0,807                        |
| Yes                           | 35    | 100,0 | 24                   | 68,6 | 11       | 31,4 |                              |
| <b>Disorganized thinking</b>  |       |       |                      |      |          |      |                              |
| No                            | 78    | 100,0 | 55                   | 70,5 | 23       | 29,5 | 0,179                        |
| Yes                           | 25    | 100,0 | 14                   | 56,0 | 11       | 44,0 |                              |
| <b>Level of consciousness</b> |       |       |                      |      |          |      |                              |
| No                            | 66    | 100,0 | 46                   | 69,7 | 20       | 30,3 | 0,435                        |
| Yes                           | 37    | 100,0 | 23                   | 62,2 | 14       | 37,8 |                              |
